# Supplementary material for: Aldose Reductase (AR) Mediates and Perivascular Adipose Tissue (PVAT) Modulates Endothelial Dysfunction of Short-Term High-Fat Diet Feeding in Mice
Source: MDPI journal article supplement (doi:10.3390/metabo13121172), 2023-11-24
Supplement: s1 [file s1]

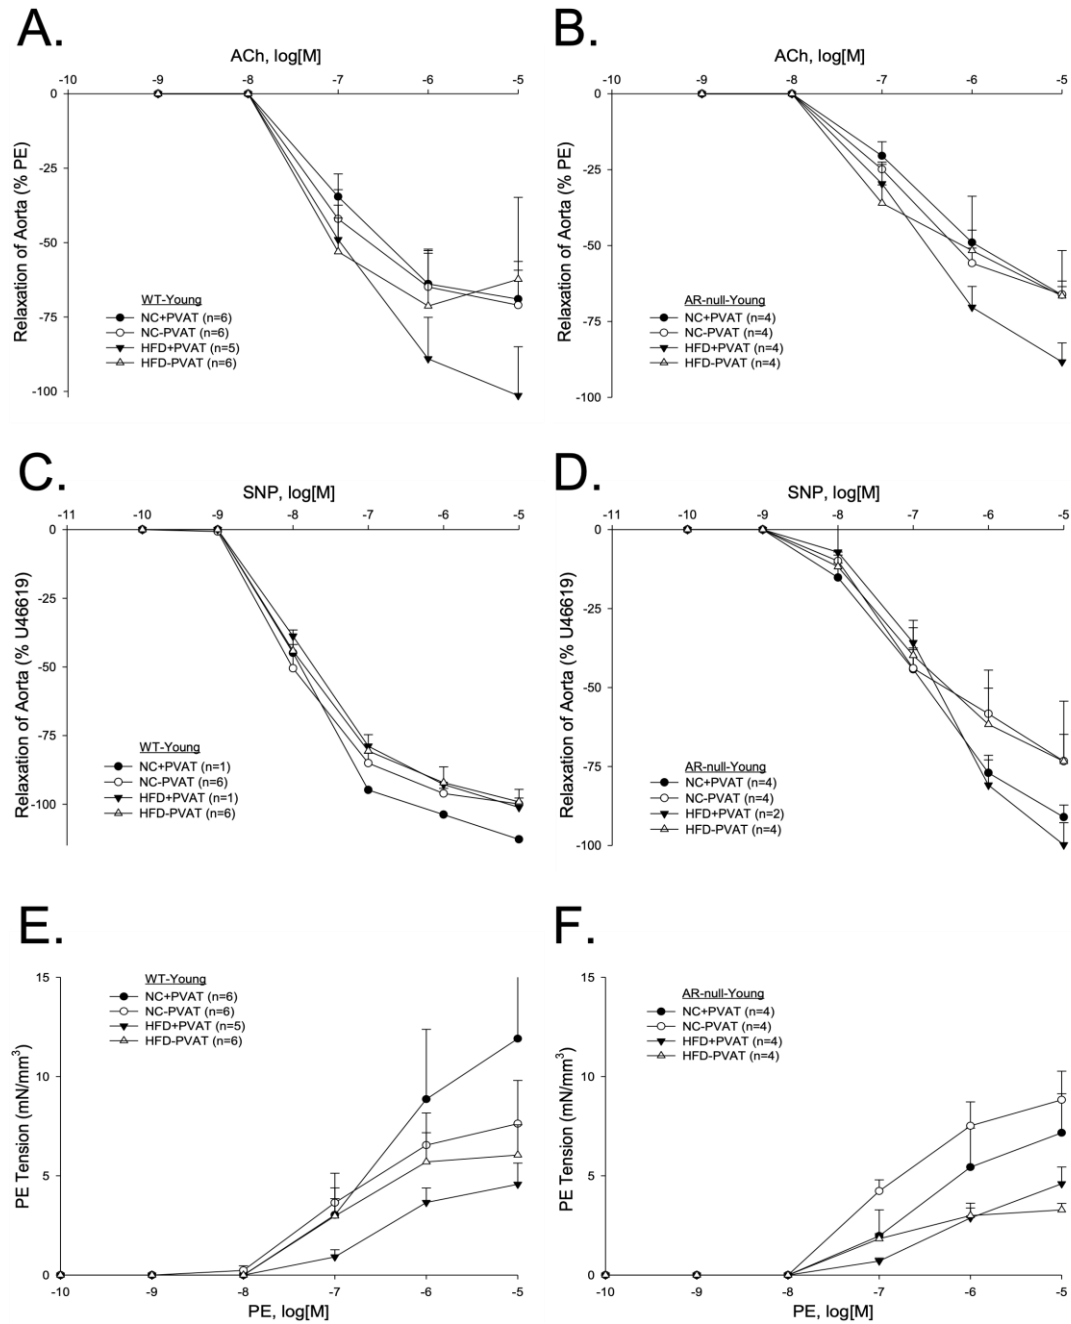

**Figure S1.** Effects of short-term high-fat diet (HFD) on thoracic aorta function without and with perivascular adipose tissue (+PVAT).
